# Supplementary material
Source: PubMed Central journal article supplement (PMC1773740)
Supplement: gut_52_8_1117__1.pdf [file gut_52_8_1117__1.pdf]

**Supplementary Table I** Prevalence of Crohn's disease by social class at birth in both cohorts

| Social class | Rate; prevalence per 10 000 (95% CI) | Unadjusted         |                   |          | Adjusted*          |                   |          |
|--------------|--------------------------------------|--------------------|-------------------|----------|--------------------|-------------------|----------|
|              |                                      | OR (95% CI)        | OR† (95% CI)      | p Value‡ | OR (95% CI)        | OR† (95% CI)      | p Value‡ |
| Linear trend |                                      |                    | 1.06 (0.87, 1.28) | 0.566    |                    | 1.06 (0.88, 1.29) | 0.542    |
| I            | 1/1017; 9.8 (-9.4, 29.1)             | 1.00               |                   |          | 1.00               |                   |          |
| II           | 10/2650; 37.6 (14.3, 60.9)           | 3.83 (0.49, 29.90) |                   |          | 3.89 (0.50, 30.39) |                   |          |
| IIINM        | 8/2347; 34.1 (10.5, 57.7)            | 3.47 (0.43, 27.74) |                   |          | 3.46 (0.43, 27.64) |                   |          |
| IIIM         | 40/9813; 40.8 (28.2, 53.4)           | 4.15 (0.57, 30.19) |                   |          | 4.21 (0.58, 30.62) |                   |          |
| IV           | 10/2662; 37.6 (14.3, 60.8)           | 3.83 (0.49, 29.87) |                   |          | 3.83 (0.49, 29.92) |                   |          |
| V            | 4/1441; 27.8 (1.0, 55.0)             | 2.82 (0.32, 25.27) |                   |          | 2.92 (0.33, 26.13) |                   |          |
| Other        | 1/301; 33.2 (-32.2, 98.6)            | 3.38 (0.21, 54.16) |                   |          | 3.14 (0.20, 50.51) |                   |          |
| Unsupported  | 4/1417; 28.2 (1.0, 55.9)             | 2.87 (0.32, 25.69) |                   |          | 3.06 (0.34, 27.49) |                   |          |
| Not known    | 0/49                                 | 0.10 (>0.00)       |                   |          | 0.09 (>0.00)       |                   |          |
| Total        | 78/21707; 35.0 (27.3, 42.7)          |                    |                   |          |                    |                   |          |

Linear trend for risk of Crohn's disease for cohorts separately (unadjusted):

BCS70: OR 1.05, 95% CI 0.81, 1.37; p=0.704;

NCDS: OR 1.07, 95% CI 0.81, 1.42; p=0.628.

\*Adjusted for cohort and sex

†Odds ratios (OR) per unit increase in social class I–V.

‡p value for linear trend across categories I–V.
