# Supplementary material
Source: PubMed Central journal article supplement (PMC1773740)
Supplement: gut_52_8_1117__2.pdf [file gut_52_8_1117__2.pdf]

**Supplementary Table 2** Prevalence of ulcerative colitis by social class at birth in both cohorts

| Social class | Rate; prevalence per 10 000<br>(95% CI) | Unadjusted         |                   |          | Adjusted*          |                   |          |
|--------------|-----------------------------------------|--------------------|-------------------|----------|--------------------|-------------------|----------|
|              |                                         | OR (95% CI)        | OR† (95% CI)      | p Value‡ | OR (95% CI)        | OR† (95% CI)      | p Value‡ |
| Linear trend |                                         |                    | 1.04 (0.88, 1.23) | 0.674    |                    | 1.03 (0.87, 1.22) | 0.750    |
| I            | 5/1017; 49.2 (6.1, 92.2)                | 1.00               |                   |          | 1.00               |                   |          |
| II           | 11/2660; 41.4 (17.0, 65.8)              | 0.84 (0.29, 2.43)  |                   |          | 0.80 (0.28, 2.30)  |                   |          |
| IIINM        | 11/2347; 46.9 (19.2, 74.5)              | 0.95 (0.33, 2.75)  |                   |          | 0.97 (0.33, 2.79)  |                   |          |
| IIIM         | 44/9813; 44.8 (31.6, 58.1)              | 0.91 (0.36, 2.30)  |                   |          | 0.87 (0.34, 2.20)  |                   |          |
| IV           | 13/2662; 48.8 (22.3, 75.3)              | 0.99 (0.35, 2.79)  |                   |          | 0.99 (0.35, 2.78)  |                   |          |
| V            | 8/1441; 55.5 (17.1, 93.9)               | 1.13 (0.37, 3.46)  |                   |          | 1.02 (0.33, 3.12)  |                   |          |
| Other        | 1/301; 33.2 (-32.2, 98.6)               | 0.68 (0.08, 5.80)  |                   |          | 0.93 (0.11, 8.10)  |                   |          |
| Unsupported  | 5/1417; 35.3 (4.4, 66.2)                | 0.72 (0.21, 2.48)  |                   |          | 0.59 (0.17, 2.06)  |                   |          |
| Not known    | 1/49; 204.1 (-206.3, 614.4)             | 4.22 (0.48, 36.80) |                   |          | 6.12 (0.69, 54.39) |                   |          |
| Total        | 99/21707; 44.7 (36.0, 53.4)             |                    |                   |          |                    |                   |          |

Linear trend for risk of ulcerative colitis for cohorts separately (unadjusted):

BCS70: OR 0.87, 95% CI 0.65, 1.16; p=0.351;

NCDS: OR 1.12, 95% CI 0.91, 1.38; p=0.302.

\*Adjusted for cohort and sex.

†Odds ratios (OR) per unit increase in social class I–V.

‡p value for linear trend across categories I–V.
