# Supplementary material
Source: PubMed Central journal article supplement (PMC1773740)
Supplement: gut_52_8_1117__3.pdf [file gut_52_8_1117__3.pdf]

**Supplementary Table 3** Prevalence of irritable bowel syndrome by social class at birth in both cohorts

| Social class | Rate; prevalence per 10 000 (95% CI) | Unadjusted        |                   |          | Adjusted*         |                   |          |
|--------------|--------------------------------------|-------------------|-------------------|----------|-------------------|-------------------|----------|
|              |                                      | OR (95% CI)       | OR† (95% CI)      | p Value‡ | OR (95% CI)       | OR† (95% CI)      | p Value‡ |
| Linear trend |                                      |                   | 0.99 (0.95, 1.03) | 0.501    |                   | 0.98 (0.94, 1.03) | 0.418    |
| I            | 91/1017; 894.8 (719.1, 1070.5)       | 1.00              |                   |          | 1.00              |                   |          |
| II           | 231/2660; 868.4 (761.3, 975.5)       | 0.97 (0.75, 1.25) |                   |          | 0.94 (0.73, 1.21) |                   |          |
| IIINM        | 194/2347; 826.6 (715.1, 938.1)       | 0.92 (0.71, 1.19) |                   |          | 0.90 (0.69, 1.17) |                   |          |
| IIIM         | 836/8977; 851.9 (796.7, 907.2)       | 0.95 (0.76, 1.19) |                   |          | 0.92 (0.73, 1.15) |                   |          |
| IV           | 213/2662; 800.2 (697.0, 903.3)       | 0.89 (0.69, 1.14) |                   |          | 0.86 (0.66, 1.11) |                   |          |
| V            | 123/1318; 953.6 (709.1, 998.1)       | 0.95 (0.72, 1.26) |                   |          | 0.93 (0.70, 1.23) |                   |          |
| Other        | 29/301; 963.5 (628.2, 1298.7)        | 1.09 (0.70, 1.68) |                   |          | 1.02 (0.66, 1.60) |                   |          |
| Unsupported  | 105/1417; 741.0 (604.5, 877.5)       | 0.81 (0.61, 1.09) |                   |          | 0.77 (0.57, 1.03) |                   |          |
| Not known    | 3/49; 612.2 (-83.5, 1308.0)          | 0.66 (0.20, 2.18) |                   |          | 0.62 (0.53, 1.07) |                   |          |
| Total        | 1825/21707; 834.6 (798.5, 870.7)     |                   |                   |          |                   |                   |          |

Linear trend for risk of irritable bowel syndrome for cohorts separately (unadjusted):

BCS70: OR 0.96, 95% CI 0.90, 1.02; p=0.173;

NCDS: OR 1.01, 95% CI 0.95, 1.07; p=0.731.

\*Adjusted for cohort and sex.

†Odds ratios (OR) per unit increase in social class I–V.

‡p value for linear trend across categories I–V.
