# Supplementary material
Source: PubMed Central journal article supplement (PMC1773740)
Supplement: gut_52_8_1117__4.pdf [file gut_52_8_1117__4.pdf]

**Supplementary Table 4** Prevalence of gall stones by social class at birth in both cohorts

| Social class | Rate; prevalence per 10 000 (95% CI) | Unadjusted         |                   |          | Adjusted*          |                   |          |
|--------------|--------------------------------------|--------------------|-------------------|----------|--------------------|-------------------|----------|
|              |                                      | OR (95% CI)        | OR† (95% CI)      | p Value‡ | OR (95% CI)        | OR† (95% CI)      | p Value‡ |
| Linear trend |                                      |                    | 1.11 (1.01, 1.22) | 0.027    |                    | 1.09 (1.00, 1.20) | 0.060    |
| I            | 8/1017; 78.7 (24.3, 133.0)           | 1.00               |                   |          | 1.00               |                   |          |
| II           | 41/2660; 154.1 (107.3, 201.0)        | 1.97 (0.92, 4.22)  |                   |          | 1.81 (0.84, 3.88)  |                   |          |
| IIINM        | 31/2347; 132.1 (85.9, 178.3)         | 1.69 (0.77, 3.68)  |                   |          | 1.71 (0.78, 3.73)  |                   |          |
| IIIM         | 176/9813; 179.4 (153.1, 205.6)       | 2.30 (1.13, 4.69)  |                   |          | 2.13 (1.04, 4.35)  |                   |          |
| IV           | 33/2662; 124.0 (81.9, 166.0)         | 1.58 (0.73, 3.44)  |                   |          | 1.54 (0.71, 3.36)  |                   |          |
| V            | 34/1441; 235.9 (157.5, 314.4)        | 3.05 (1.40, 6.60)  |                   |          | 2.61 (1.20, 5.68)  |                   |          |
| Other        | 6/301; 199.3 (40.5, 358.1)           | 2.56 (0.88, 7.44)  |                   |          | 3.94 (1.34, 11.59) |                   |          |
| Unsupported  | 29/1417; 204.7 (130.8, 278.5)        | 2.63 (1.20, 5.78)  |                   |          | 2.00 (0.91, 4.41)  |                   |          |
| Not known    | 1/49; 204.1 (-206.2, 614.4)          | 2.63 (0.32, 21.41) |                   |          | 4.33 (0.52, 35.85) |                   |          |
| Total        | 359/21707; 204.1 (-206.3, 614.4)     |                    |                   |          |                    |                   |          |

Linear trend for risk of gall stones for cohorts separately (unadjusted):

BCS70: OR 1.17, 95% CI 0.96, 1.41; p=0.116;

NCDS: OR 1.08, 95% CI 0.97, 1.20; p=0.175.

\*Adjusted for cohort and sex.

†Odds ratios (OR) per unit increase in social class I–V.

‡p value for linear trend across categories I–V.
