# Supplementary material
Source: PubMed Central journal article supplement (PMC1773740)
Supplement: gut_52_8_1117__5.pdf [file gut_52_8_1117__5.pdf]

**Supplementary Table 5** Prevalence of peptic ulcer disease by social class at birth in two cohorts

| Social class | Rate; prevalence per 10 000 (95% CI) | Unadjusted        |                   |          | Adjusted*          |                   |          |
|--------------|--------------------------------------|-------------------|-------------------|----------|--------------------|-------------------|----------|
|              |                                      | OR (95% CI)       | OR† (95% CI)      | p Value‡ | OR (95% CI)        | OR† (95% CI)      | p Value‡ |
| Linear trend |                                      |                   | 1.19 (1.11, 1.27) | 0.000    |                    | 1.18 (1.10, 1.26) | 0.000    |
| I            | 19/1017; 186.8 (103.5, 270.2)        | 1.00              |                   |          | 1.00               |                   |          |
| II           | 65/2660; 244.4 (185.6, 303.1)        | 1.31 (0.78, 2.20) |                   |          | 1.28 (0.76, 2.15)  |                   |          |
| IIINM        | 64/2347; 272.7 (206.8, 338.6)        | 1.47 (0.88, 2.47) |                   |          | 1.50 (0.90, 2.52)  |                   |          |
| IIIM         | 353/9813; 359.7 (322.9, 396.6)       | 1.96 (1.23, 3.12) |                   |          | 1.92 (1.21, 3.07)  |                   |          |
| IV           | 96/2662; 360.6 (289.8, 431.5)        | 1.96 (1.19, 3.23) |                   |          | 2.00 (1.21, 3.28)  |                   |          |
| V            | 69/1441; 478.8 (368.5, 589.2)        | 2.64 (1.58, 4.41) |                   |          | 2.46 (1.47, 4.12)  |                   |          |
| Other        | 8/301; 265.8 (83.0, 448.5)           | 1.43 (0.62, 3.30) |                   |          | 1.96 (0.85, 4.55)  |                   |          |
| Unsupported  | 71/1417; 501.1 (387.3, 614.8)        | 2.77 (1.66, 4.62) |                   |          | 2.42 (1.45, 4.05)  |                   |          |
| Not known    | 2/49; 408.2 (-166.1, 982.4)          | 2.23 (0.51, 9.86) |                   |          | 3.20 (0.72, 14.22) |                   |          |
| Total        | 747/21707; 342.7 (319.0, 366.4)      |                   |                   |          |                    |                   |          |

Linear trend for risk of peptic ulcer disease for cohorts separately (unadjusted):

BCS70: OR 1.11, 95% CI 0.99, 1.24; p=0.068;

NCDS: OR 1.22, 95% CI 1.12, 1.32; p=0.000.

\*Adjusted for cohort and sex.

†Odds ratios (OR) per unit increase in social class I–V.

‡p value for linear trend across categories I–V.
